# Supplementary material for: Generation and Characterization of iPS Cells Derived from APECED Patients for Gene Correction
Source: PubMed Central journal article supplement (PMC9010864; doi:10.3389/fendo.2022.794327), 2022-04-01
Supplement: Table_1.pdf [file Table_1.pdf]

**Supplementary Table 1.** Primers used in qPCR

| Gene   | Accession N#.  | Forward Primer (5'-3') | Reverse Primer (5'-3')  | product size (bp) |
|--------|----------------|------------------------|-------------------------|-------------------|
| GAPDH1 | NM_002046.5    | CTCTGCTCCTCCTGTTTCGAC  | GCGCCAATACGACCAAATC     | 121               |
| AIRE   | NM_000383.3    | CCCAGCTCCACCAGAAGAATG  | GGTGGACCTCTTACCTCCTCT   | 277               |
| OCT4   | NM_001285986.2 | TTGGGCTCGAGAAGGATGTG   | TCCTCTCGTTGTGCATAGTCG   | 91                |
| SOX2   | NM_003106.4    | GCCCTGCAGTACAACCTCCAT  | TGCCCTGCTGCGAGTAGGA     | 85                |
| NANOG  | NM_001355281.2 | CTCAGCCTCCAGCAGATGC    | TAGATTCATTCTCTGGTTCTGG  | 94                |
| TDGF1  | NM_001174136.2 | TCAGAGATGACAGCATTTGGC  | TTCAGGCAGCAGGTTCTGTTTA  | 118               |
| p53    | NM_000546.5    | TGTGACTTGCACGTACTCCC   | ACCATCGCTATCTGAGCAGC    | 199               |
| MYC    | NM_002467.5    | CAGCGACTCTGAGGAGGAAC   | GCTGGTGCATTTTCGGTTGT    | 286               |
| FAS    | NM_152871      | CCCTGTCCTCCAGGTGAAAG   | CCTTCTGTGCTTTCTGCATGT   | 367               |
| LIN28A | NM_024674.5    | AGATCAAAAGGAGACAGGTGCT | AATAGCCCCCACCATTGTG     | 256               |
| LIN28B | NM_001004317.3 | GCAGAAGATCACTCCGTTCCA  | CCTCCATGAATAGTTTGCTTGGT | 290               |
