# Supplementary material for: Generation and Characterization of iPS Cells Derived from APECED Patients for Gene Correction
Source: PubMed Central journal article supplement (PMC9010864; doi:10.3389/fendo.2022.794327), 2022-04-01
Supplement: Table_2.pdf [file Table_2.pdf]

**Supplementary table 2.** Primary antibodies used for immunostaining.

The monoclonal AIRE 6.1 antibody was produced in-house from a mouse hybridoma (41) and the clone was generated against a peptide comprising amino acids 1-206 of the N-terminus of the AIRE protein.

| <b>Antibody</b>   | <b>Host species</b> | <b>Dilution</b> | <b>Manufacturer</b>       | <b>Product code</b> | <b>RRID</b> |
|-------------------|---------------------|-----------------|---------------------------|---------------------|-------------|
| AIRE 6.1          | Mouse               | 1:100           | in-house                  | N/A                 | N/A         |
| Oct-4A (C52G3)    | Rabbit              | 1:1000          | Cell Signaling Technology | 2890                | AB_2167725  |
| Nanog (D73G4) XP® | Rabbit              | 1:100           | Cell Signaling Technology | 4903                | AB_10559205 |
| Ki-67 (8D5)       | Mouse               | 1:400           | Cell Signaling Technology | 9449                | AB_2797703  |
